# Supplementary material
Source: Springer Nature journal article supplement (https://www.springermedizin.de/resource/supplementary/12889_2009_2148_MOESM4_ESM.pdf/9484758)

## The metabolic syndrome

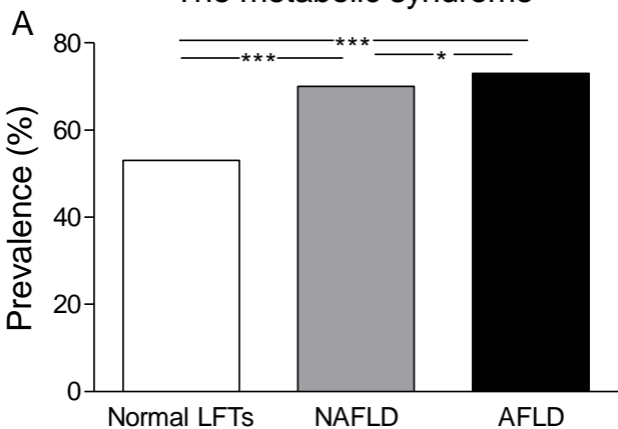

## Impaired glucose tolerance

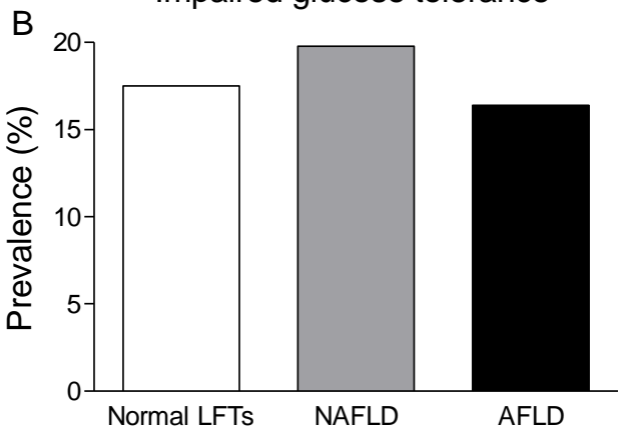

## Type 2 diabetes

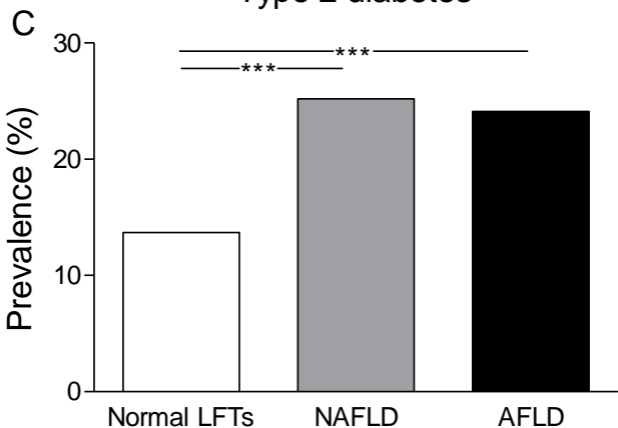

Supplement: MOESM4 [file 9484758]
